# Supplementary material for: Prognostic role and implications of mutation status of tumor suppressor gene ARID1A in cancer: a systematic review and meta-analysis
Source: PubMed Central journal article supplement (PMC4770758; doi:10.18632/oncotarget.5142), 2015-09-08
Supplement: oncotarget-06-39088-s001.pdf [file oncotarget-06-39088-s001.pdf]

SUPPLEMENTARY FIGURES AND TABLES

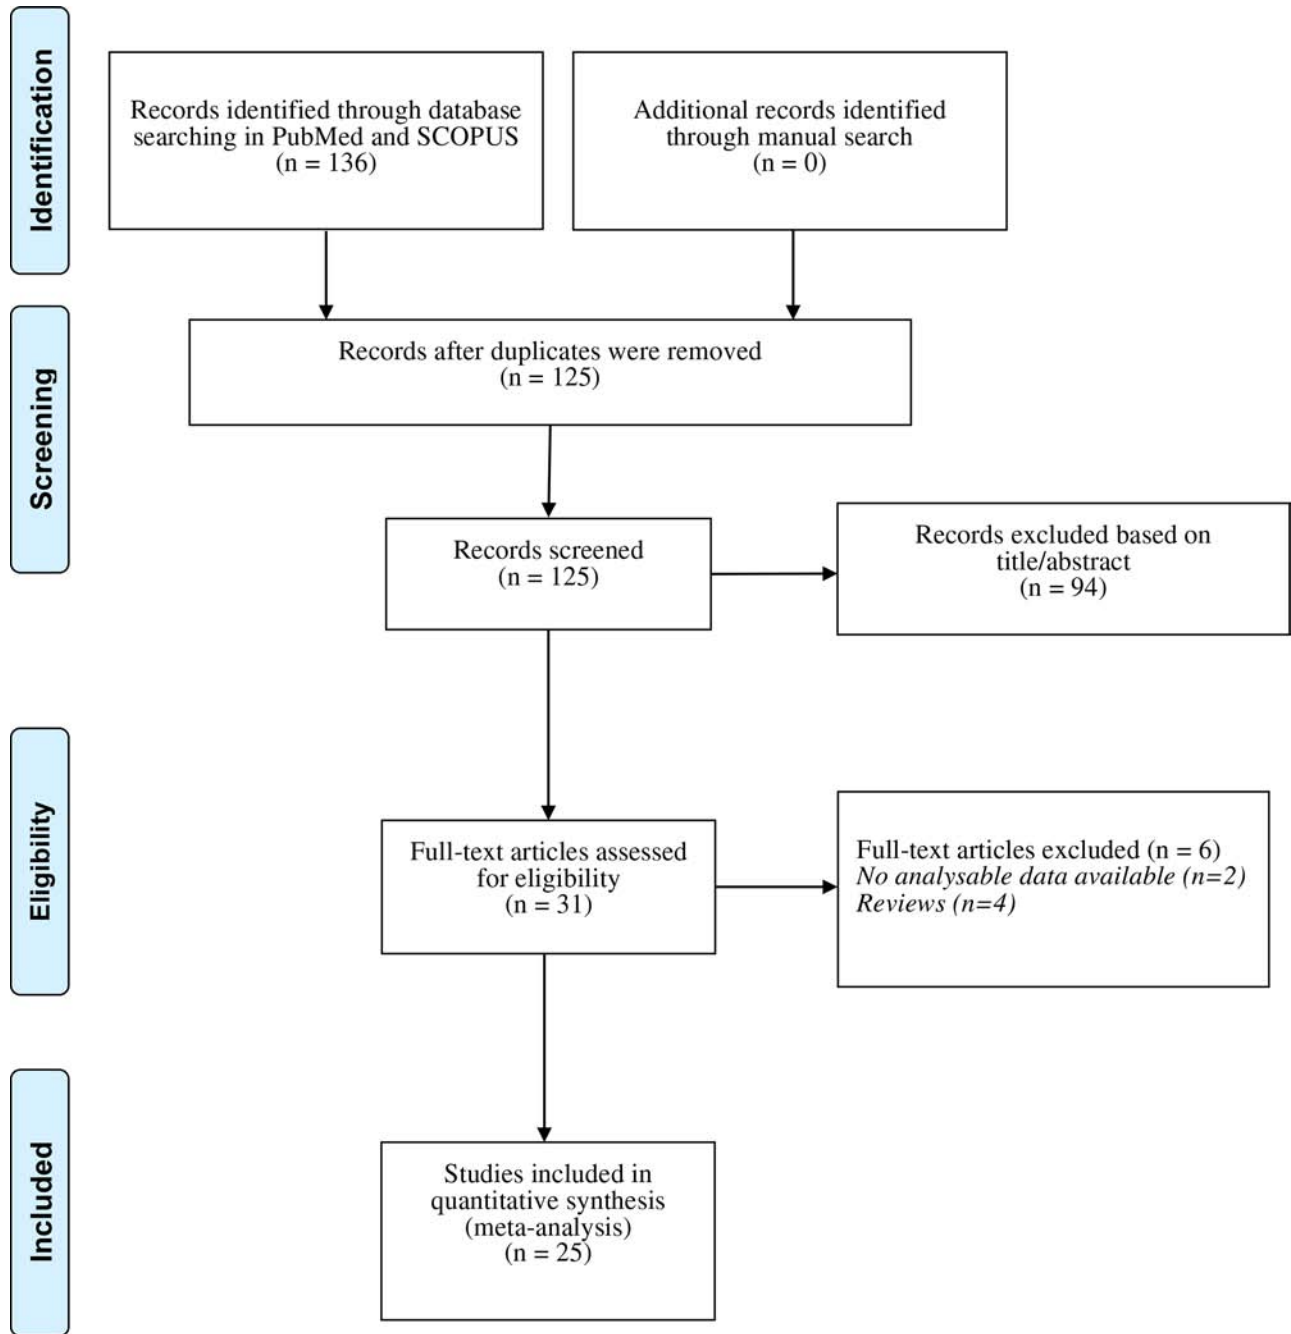

Supplementary Figure S1: PRISMA Flow-Diagram.

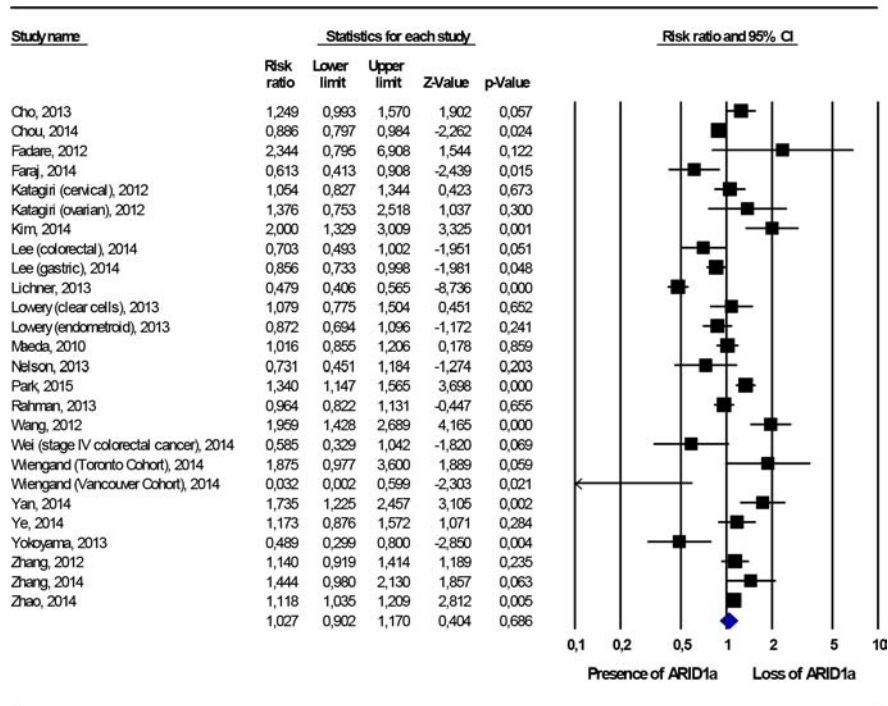

Supplementary Figure S2: Pooled Risk Ratios For All-Cause Mortality According To ARID1A Status.

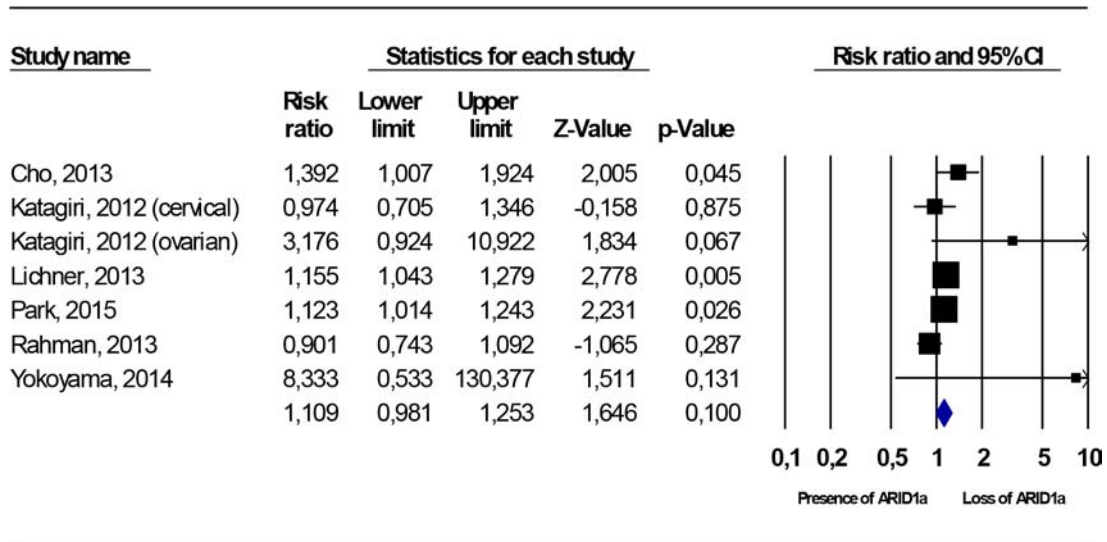

Supplementary Figure S3: Pooled Risk Ratios For Recurrence According To ARID1A Status.

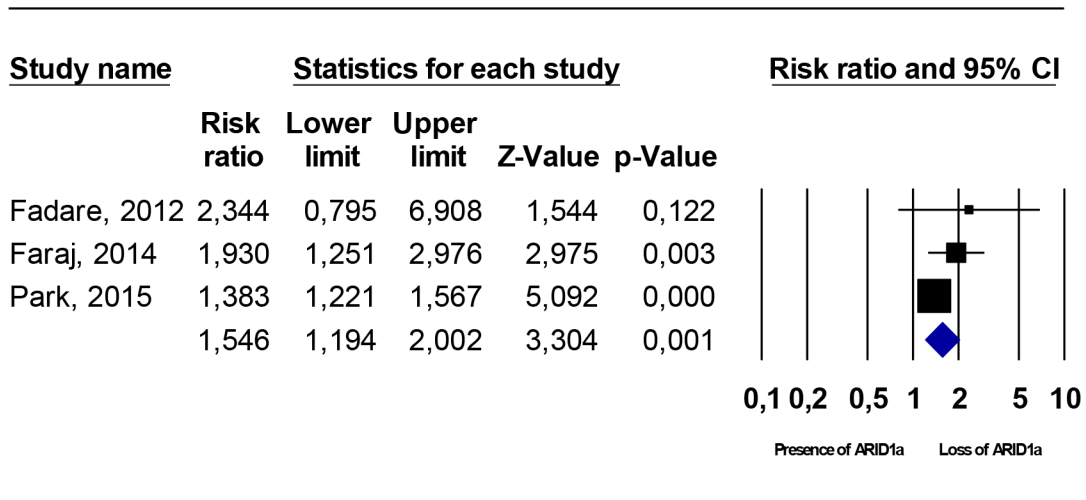

Supplementary Figure S4: Pooled Risk Ratios For Death Due To Cancer According To ARID1A Status.

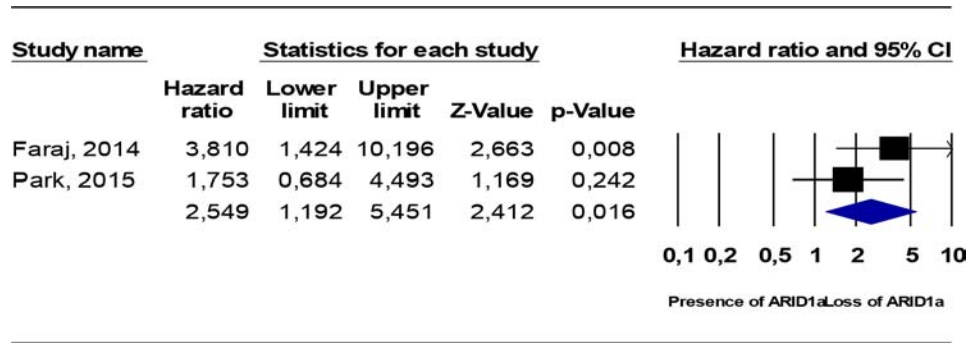

Supplementary Figure S5: Pooled Hazard Ratio (Adjusted For Potential Confounders) For Death Due To Cancer According To ARID1A Status.

**Supplementary Table S1: Characteristics Of The Studies According To The Expression Of ARID1A**

| Study Author, Year (Country)             | Type of cancer                                   | Exclusion criteria                                              | Other genes/proteins abnormalities | ARID1A+                |                   |                   |                                      |                           |                        |                   |                   |                                    |                           | Mean Follow-up period (years) |                                                        |                       |
|------------------------------------------|--------------------------------------------------|-----------------------------------------------------------------|------------------------------------|------------------------|-------------------|-------------------|--------------------------------------|---------------------------|------------------------|-------------------|-------------------|------------------------------------|---------------------------|-------------------------------|--------------------------------------------------------|-----------------------|
|                                          |                                                  |                                                                 |                                    | Number of participants | N. of females (%) | Mean Age $\pm$ SD | TNM stage at baseline (number, %)    | Tumor Grading             | Number of participants | N. of females (%) | Mean Age $\pm$ SD | TNM stage at baseline (number, %)  | Tumor Grading             |                               | Methods of ARID1A analysis (if IHC: clone specified) # | Number of adjustments |
| <b>Cho, 2013 (Korea)</b>                 | Cervical cancer                                  | No data at follow-up; no clinicopathological data               | No                                 | 27                     | 100%              | 49.0 $\pm$ 14.3   | FIGO I-II: 81.5%<br>FIGO IV: 18.5%   | G1-G2: 48.2%<br>G3: 51.8% | 120                    | 100%              | 48.5 $\pm$ 11.1   | FIGO I-II: 96.6%<br>FIGO IV: 3.4%  | G1-G2: 66.9%<br>G3: 33.1% | TMA-IHC (1)                   | 4                                                      | 4.5                   |
| <b>Chou, 2014 (Australia)</b>            | Colorectal cancer                                | NA                                                              | BRAF (V600E), MMR status           | 74                     | 62.2%             | 77.0 $\pm$ 8.0    | Stage: I-II: 56.7%<br>III-IV: 43.3%  | G1-G2: 42.9%<br>G3: 57.1% | 1334                   | 50.9%             | 71.2 $\pm$ 12.6   | Stage I-II: 53.3%<br>III-IV: 46.7% | G1-G2: 82.0%<br>G3: 18.0% | TMA-IHC (2)                   | 6                                                      | 5.3                   |
| <b>Fadare, 2012 (USA)</b>                | Endometrial clear cell carcinoma                 | Not pure histology (considered only pure clear cell carcinomas) | No                                 | 5                      | 100%              | 63 (range 61-78)  | FIGO I-II: 0%<br>III-IV: 100%        | NA                        | 17                     | 100%              | 69 (range 54-87)  | FIGO I-II: 94.1%<br>III-IV: 5.9%   | NA                        | Whole-section IHC (1)         | 0                                                      | 3.9                   |
| <b>Faraj, 2014 (USA)</b>                 | Invasive urothelial carcinoma of urinary bladder | TMA with normal urothelium                                      | No                                 | 85                     | 8.2%              | 65.3 $\pm$ 11.3   | Stage 0-I-II: 43.5%<br>III-IV: 56.5% | NA                        | 37                     | 45.9%             | 67.1 $\pm$ 9.8    | Stage I-II: 70.3%<br>III-IV: 29.7% | NA                        | TMA-IHC (2)                   | 5                                                      | 3.9                   |
| <b>Katagiri, 2012 (Japan) (cervical)</b> | Adeno-(squamous) carcinomas of uterine cervix    | Squamous carcinomas (focus on adenocarcinomas)                  | Ki-67                              | 14                     | 100%              | 49.8 $\pm$ 13.5   | Stage I-II: 78.6%<br>III-IV: 21.4%   | NA                        | 31                     | 100%              | 46.8 $\pm$ 10.9   | Stage I-II: 74.2%<br>III-IV: 25.8% | NA                        | TMA-IHC (1)                   | 0                                                      | 3.8                   |
| <b>Katagiri, 2012 (Japan)</b>            | Ovarian clear cell carcinoma                     | NA                                                              | Ki-67                              | 9                      | 100%              | 53.1 $\pm$ 3.3    | Stage I-II: 44.4%<br>III-IV: 55.6%   | G3: 100%                  | 51                     | 100%              | 53.2 $\pm$ 9.1    | Stage I-II: 80.4%<br>III-IV: 19.6% | G3: 100%                  | TMA-IHC (1)                   | 3                                                      | 3.8                   |

(Continued)

**ARIDIA- ARIDIA+**

|                               | Small intestinal carcinoma                 | Cases with core loss in IHC slides                | p53                                | 96  | 38.9% | NA          | NA                                 | Stage I-II: 16.7%<br>III-IV: 83.3%                 | G1-G2: 63.9%<br>G3-G4: 36.1%                       | 82  | 37.3% | NA          | 59.4 ± 12.1                        | Stage I-II: 12.5%<br>III-IV: 87.5%                  | G1-G2: 79.6%<br>G3-G4: 20.4%                        | TMA-IHC (2)           | 0                  | 4.6 |
|-------------------------------|--------------------------------------------|---------------------------------------------------|------------------------------------|-----|-------|-------------|------------------------------------|----------------------------------------------------|----------------------------------------------------|-----|-------|-------------|------------------------------------|-----------------------------------------------------|-----------------------------------------------------|-----------------------|--------------------|-----|
| <b>Kim, 2014 (Korea)</b>      | Small intestinal carcinoma                 | Cases with core loss in IHC slides                | p53                                | 96  | 38.9% | NA          | NA                                 | Stage I-II: 16.7%<br>III-IV: 83.3%                 | G1-G2: 63.9%<br>G3-G4: 36.1%                       | 82  | 37.3% | NA          | 59.4 ± 12.1                        | Stage I-II: 12.5%<br>III-IV: 87.5%                  | G1-G2: 79.6%<br>G3-G4: 20.4%                        | TMA-IHC (2)           | 0                  | 4.6 |
| <b>Lee, 2014 (Korea)</b>      | Colorectal cancer                          | Hereditary Syndromes                              | No                                 | 12  | 41.7% | 65.3 ± 11.8 | Stage I-II: 68.2%<br>III-IV: 31.8% | G1-G2: 91.7%<br>G3: 8.3%                           | G1-G2: 91.7%<br>G3: 8.3%                           | 184 | 45.7% | 59.4 ± 12.1 | Stage I-II: 12.5%<br>III-IV: 87.5% | G1-G2: 86.9%<br>G3: 13.1%                           | G1-G2: 86.9%<br>G3: 13.1%                           | TMA-IHC (2)           | 5                  | 5   |
| <b>Lee, 2014 (Korea)</b>      | Gastric cancer                             | Hereditary Syndromes                              | No                                 | 22  | 40.9% | 63.4 ± 9.9  | Stage I-II: 68.2%<br>III-IV: 31.8% | NA                                                 | NA                                                 | 248 | 36.4% | 59.5 ± 11.5 | Stage I-II: 63.6%<br>III-IV: 36.4% | NA                                                  | NA                                                  | TMA-IHC (2)           | 4                  | 5   |
| <b>Lichner, 2013 (Canada)</b> | Renal cancer                               | NA                                                | No                                 | 139 | 43.1% | 60.1 ± 1.9  | Stage I: 47.9%<br>II-IV: 52.1%     | G1: 57.9%<br>G2-G3: 42.1%                          | G1: 57.9%<br>G2-G3: 42.1%                          | 265 | 56.9% | 59.6 ± 1.4  | Stage I: 56.9%<br>II-IV: 43.1%     | G1: 42.1%<br>G2-G3: 57.9%                           | G1: 42.1%<br>G2-G3: 57.9%                           | TMA-IHC (3)           | 2                  | 5   |
| <b>Lowery, 2012 (USA)</b>     | Clear cell and endometrioid ovarian cancer | No                                                | No                                 | 96  | 100%  | >49: 61.5%  | Stage I-II: 64.2%<br>III-IV: 35.8% | G1-G2: 46.8%<br>G3: 53.2%                          | G1-G2: 46.8%<br>G3: 53.2%                          | 116 | 100%  | >49: 70.7%  | Stage I-II: 58.3%<br>III-IV: 41.7% | G1-G2: 36.0%<br>G3: 64.0%                           | G1-G2: 36.0%<br>G3: 64.0%                           | Whole-section IHC (3) | 0 for both cancers | 5.9 |
| <b>Maeda, 2010 (Japan)</b>    | Ovarian clear cell carcinoma               | No data at follow-up; no clinicopathological data | No                                 | 83  | 100%  | >49: 69.0%  | Stage I-II: 74.3%<br>III/IV: 25.7% | Nuclear atypia: mild-moderate 91.4%<br>Severe 8.6% | Nuclear atypia: mild-moderate 91.4%<br>Severe 8.6% | 52  | 100%  | >49: 58.1%  | Stage I-II: 74.5%<br>III/IV: 25.5% | Nuclear atypia: mild-moderate 83.9%<br>Severe 16.1% | Nuclear atypia: mild-moderate 83.9%<br>Severe 16.1% | TMA-IHC (4)           | 0                  | 5.0 |
| <b>Nelson, 2013 (Canada)</b>  | Endometrial carcinoma                      | No                                                | MMR genes                          | 19  | 100%  | 64.3 ± 8.6  | Stage I-II: 61%<br>III-IV: 39%     | G3: 100%                                           | G3: 100%                                           | 39  | 100%  | 59.8 ± 6.4  | Stage I-II: 59.0%<br>III-IV: 41.0% | G3: 100%                                            | G3: 100%                                            | TMA-IHC (NS)          | 0                  | 5.0 |
| <b>Numata, 2013 (Japan)</b>   | Pancreatic cancer                          | No                                                | Proteins: BRM, BRG1, BAF180, BAF47 | 34  | 61.8% | >64: 61.8%  | Stage 0-III: 29.4%<br>IV: 70.6%    | G1: 41.2%<br>G2-G3: 58.8%                          | G1: 41.2%<br>G2-G3: 58.8%                          | 34  | 44.1% | >64: 50%    | Stage 0-III: 38.2%<br>IV: 61.8%    | G1: 18/34.<br>52.9%<br>G2-G3: 47.1%                 | G1: 18/34.<br>52.9%<br>G2-G3: 47.1%                 | TMA-IHC (1)           | 0                  | 5.0 |

(Continued)

ARIDIA-

ARIDIA+

|                                                 |                                 |                                                                                    |                                |     |       |            |                                      |                            |     |       |            |                                      |                           |                            |    |     |
|-------------------------------------------------|---------------------------------|------------------------------------------------------------------------------------|--------------------------------|-----|-------|------------|--------------------------------------|----------------------------|-----|-------|------------|--------------------------------------|---------------------------|----------------------------|----|-----|
| <b>Park, 2015 (Korea)</b>                       | Clear cell renal cell carcinoma | No                                                                                 | No                             | 213 | 26.3% | 58.4±10.4  | Stage I-II: 71.7% III/IV: 28.3%      | G1-G2: 43.7% G3-G4: 56.3%  | 77  | 23.4% | >55: 46.7% | Stage I-II: 85.7% III/IV: 14.3%      | G1-G2: 71.1% G3-G4: 29.9% | TMA-IHC (1)                | 2  | 6.9 |
| <b>Rahman, 2013 (Japan)</b>                     | Endometrial cancer              | No                                                                                 | p53, hMLH1, Her2, PTEN, ER, PR | 27  | 100%  | >59: 48.1% | FIGO Stage I-II: 63.0% III/IV: 37.0% | G1-G2: 85.2% G3: 14.8%     | 84  | 100%  | 59.8±12.6  | FIGO Stage I-II: 72.6% III/IV: 27.4% | G1-G2: 30.2% G3: 29.8%    | Whole-section IHC (1)      | 0  | 4.3 |
| <b>Wang, 2011 (USA)</b>                         | Gastric cancer                  | NA                                                                                 | TP53                           | 38  | NA    | NA         | NA                                   | NA                         | 71  | NA    | NA         | NA                                   | NA                        | Exome-sequencing, IHC (NS) | 3  | 5.0 |
| <b>Wang, 2012 (China)</b>                       | Gastric cancer                  | No                                                                                 | No                             | 115 | 27.8% | >54: 49.6% | NA                                   | G1-G2: 13.1% G3: 86.9%     | 109 | 39.4% | >54: 57.8% | NA                                   | G1-G2: 30.3% G3: 69.7%    | Whole-section IHC (3)      | 5  | 5.0 |
| <b>Wei, 2014 (China)</b>                        | Colorectal cancer               | No                                                                                 | No                             | 54  | 22.2% | >55: 44.4% | Stage I-II: 31.5% III-IV: 68.5%      | G1-G2: 74.1% G3: 25.9%     | 155 | 13.5% | >55: 51%   | Stage I-II: 42.6% III-IV: 57.4%      | G1-G2: 85.8% G3: 14.2%    | Whole-section IHC (1)      | 2  | 5.0 |
| <b>Wiegand, 2014 (Canada, Toronto cohort)</b>   | Gastric carcinoma               | Totally in 2 cohorts 102 cases (no data at follow-up; no clinicopathological data) | MMR, HER2, EBV, p53            | 16  | 37.5% | 71.6±13.2  | Stage I-II: 31.5% III-IV: 68.5%      | G2: 4. 25.0% G3: 12. 75.0% | 64  | 31.3% | 66.6±11.1  | Stage I-II: 34.3% III-IV: 65.7%      | G1-G2: 46.9% G3: 53.1%    | TMA-IHC (2)                | 10 | 2.0 |
| <b>Wiegand, 2014 (Canada, Vancouver cohort)</b> | Gastric carcinoma               | Totally in 2 cohorts 102 cases (no data at follow-up; no clinicopathological data) | MMR, HER2, EBV, p53            | 29  | 25.6% | 66.4±12.2  | Stage I-II: 44.1% III-IV: 55.9%      | G1-G2: 51.2% G3: 48.8%     | 134 | 27.6% | 64.1±10.5  | Stage I-II: 45.5% III-IV: 54.5%      | G1-G2: 47.8% G3: 52.2%    | TMA-IHC (2)                | 10 | 2.0 |

(Continued)



| ARIDIA+                        |                      |                                       |                         |     |       |                           |                                    |                           |     |       |                             |                                    |                                         |                        |   |     |
|--------------------------------|----------------------|---------------------------------------|-------------------------|-----|-------|---------------------------|------------------------------------|---------------------------|-----|-------|-----------------------------|------------------------------------|-----------------------------------------|------------------------|---|-----|
| ARIDIA-                        |                      |                                       |                         |     |       |                           |                                    |                           |     |       |                             |                                    |                                         |                        |   |     |
| <b>Yan, 2014 (China)</b>       | Gastric cancer       | 7 cases (follow-up lost)              | E-cadherin              | 52  | 51.2% | 54.4±8.7                  | Stage I-II: 18.2%<br>III-IV: 81.8% | G1-G2: 36.4%<br>G3: 63.6% | 137 | 32.3% | 58.4±10.5                   | Stage I-II: 16.3%<br>III-IV: 83.7% | G1-G2: 34.9%<br>G3: 65.1%               | TMA-IHC (4)            | 4 | 5.0 |
| <b>Ye, 2014 (USA)</b>          | Colorectal carcinoma | 45 TMA cores excluded for tissue loss | MMR                     | 22  | 54.5% | Mean: 62.0 (range: 36-89) | Stage I-II: 45.4%<br>III-IV: 54.6% | Low: 50%<br>High: 50%     | 235 | 48.1% | Mean: 49.7<br>Range (18-86) | Stage I-II: 50.2%<br>III-IV: 49.8% | Low: 87.2%<br>High and medullary: 12.8% | TMA-IHC (4)            | 0 | 4.8 |
| <b>Yokoyama, 2014 (Japan)*</b> | Ovarian Carcinoma    | No                                    | No                      | 11  | 100%  | 52.0±9.5                  | Stage III-IV: 100%                 | NA                        | 35  | 100%  | 56±7.8                      | Stage III-IV: 100%                 | NA                                      | Whole-section IHC (1)  | 5 | 5.3 |
| <b>Zhang, 2012 (China)</b>     | Breast cancer        | No                                    | HER2, p53, ER, PR, Ki67 | 22  | 100%  | 59.9±11.3                 | Stage I-II: 90.9%<br>III: 9.1%     | NA                        | 18  | 100%  | 60.3±12.3                   | Stage I-II: 77.8%<br>III: 22.2%    | NA                                      | mRNA real-time PCR (1) | 4 | 5.4 |
| <b>Zhang, 2014 (China)</b>     | Breast cancer        | No                                    | HER2, p53, ER, PR, Ki67 | 63  | 100%  | 59.9±9.9                  | Stage I-II: 93.7%<br>III: 6.3%     | NA                        | 49  | 100%  | 61.3±10.3                   | Stage I-II: 91.8%<br>III: 8.2%     | NA                                      | Whole-section IHC (1)  | 0 | 3.1 |
| <b>Zhao, 2014 (China)</b>      | Breast cancer        | No                                    | p53, HER2, ER, PR       | 324 | NA    | >45: 66.7%                | Stage I-II: 74.7%<br>III: 25.3%    | G1-G2: 71.9%<br>G3: 28.1% | 172 | NA    | >45: 53.5%                  | Stage I-II: 89.5%<br>III: 10.5%    | G1-G2: 78.5%<br>G3: 21.5%               | TMA-IHC (4)            | 9 | 5.8 |

(Continued)



**Supplementary Table S2: Methodological Quality Of Cohort Studies Included In The Meta-Analysis\***

| First author, publication year | Representativeness of the exposed cohort | Selection of the unexposed cohort | Ascertainment of exposure <sup>†</sup> | Outcome of interest not present at start of study <sup>††</sup> | Control for important factor or additional factor <sup>†††</sup> | Assessment of outcome | Follow-up long enough for outcome to occur <sup>††††</sup> | Adequacy of follow-up cohorts | Total quality scores |
|--------------------------------|------------------------------------------|-----------------------------------|----------------------------------------|-----------------------------------------------------------------|------------------------------------------------------------------|-----------------------|------------------------------------------------------------|-------------------------------|----------------------|
| Cho, 2013                      | *                                        | *                                 | *                                      | *                                                               | *                                                                | *                     | -                                                          | *                             | 7                    |
| Chou, 2014                     | *                                        | *                                 | *                                      | -                                                               | **                                                               | *                     | *                                                          | *                             | 8                    |
| Fadare, 2012                   | *                                        | *                                 | *                                      | *                                                               | -                                                                | *                     | -                                                          | *                             | 6                    |
| Faraj, 2014                    | *                                        | *                                 | *                                      | *                                                               | *                                                                | *                     | *                                                          | -                             | 7                    |
| Katagiri, 2012 (cervical)      | *                                        | *                                 | -                                      | *                                                               | **                                                               | *                     | -                                                          | *                             | 7                    |
| Katagiri, 2012 (ovarian)       | *                                        | *                                 | -                                      | *                                                               | **                                                               | *                     | -                                                          | *                             | 7                    |
| Kim, 2014                      | *                                        | *                                 | *                                      | -                                                               | **                                                               | *                     | -                                                          | *                             | 7                    |
| Lee, 2014                      | *                                        | *                                 | *                                      | -                                                               | *                                                                | *                     | *                                                          | *                             | 7                    |
| Lichner, 2013                  | *                                        | *                                 | *                                      | -                                                               | -                                                                | *                     | -                                                          | *                             | 7                    |
| Lowery, 2012                   | *                                        | *                                 | *                                      | -                                                               | *                                                                | *                     | *                                                          | *                             | 7                    |
| Maeda, 2010                    | *                                        | *                                 | *                                      | -                                                               | *                                                                | *                     | -                                                          | *                             | 6                    |
| Nelson, 2013                   | *                                        | *                                 | *                                      | -                                                               | **                                                               | *                     | -                                                          | -                             | 6                    |
| Numata, 2013                   | *                                        | *                                 | -                                      | -                                                               | **                                                               | *                     | -                                                          | *                             | 6                    |
| Park, 2015                     | *                                        | *                                 | *                                      | *                                                               | *                                                                | *                     | *                                                          | *                             | 8                    |
| Rahman, 2013                   | *                                        | *                                 | *                                      | *                                                               | **                                                               | *                     | -                                                          | *                             | 8                    |
| Wang, 2011                     | *                                        | *                                 | *                                      | -                                                               | *                                                                | *                     | -                                                          | *                             | 6                    |
| Wang, 2012                     | *                                        | *                                 | *                                      | -                                                               | *                                                                | *                     | *                                                          | *                             | 7                    |
| Wei, 2014                      | *                                        | *                                 | *                                      | -                                                               | *                                                                | *                     | *                                                          | *                             | 7                    |
| Wiegand, 2014                  | *                                        | *                                 | *                                      | *                                                               | **                                                               | *                     | *                                                          | *                             | 9                    |
| Yan, 2014                      | *                                        | *                                 | *                                      | -                                                               | *                                                                | *                     | -                                                          | -                             | 5                    |
| Ye, 2014                       | *                                        | *                                 | *                                      | -                                                               | *                                                                | *                     | *                                                          | *                             | 7                    |
| Yokoyama, 2014                 | *                                        | *                                 | *                                      | *                                                               | *                                                                | *                     | *                                                          | *                             | 8                    |
| Zhao, 2014                     | *                                        | *                                 | *                                      | -                                                               | **                                                               | *                     | *                                                          | *                             | 8                    |

Original studies were analyzed in the quality assessment.

\* A study could be awarded a maximum of one star for each item except for the item Control for important factor or additional factor. The definition/explanation of each column of the Newcastle-Ottawa Scale is available at [http://www.ohri.ca/programs/clinical\\_epidemiology/oxford.htm](http://www.ohri.ca/programs/clinical_epidemiology/oxford.htm).

† For this index, one star was given if in Method section the ARIDIA assessment was calculated with genetic analysis, whole section-IHC, TMA-IHC with at least 2 cores per case or with an adjunctive method or technique as control.

†† Being outcome of interest mortality, we took as outcome of interest for assessment of quality if the disease-specific survival or the recurrence rate was assessed.

††† A maximum of 2 stars could be awarded for this item. Studies that controlled their survival analyses for at least two confounders received one star, whereas studies that controlled genetic status of other gene/genes, an additional star.

†††† A cohort study with a mean/median follow-up time  $\geq 5$  y (60 months) takes one star.

**Supplementary Table S3: Results Of Univariable Moderator Analyses For All-Cause Mortality, Recurrence Of Disease And Adjusted HR Estimates For All-Cause Mortality And Recurrence By ARID1A Status**

| Moderator Variable                                                                                        |                               | All-cause mortality            | Recurrence     | Adjusted HR estimates for all-cause mortality | Adjusted HR estimates for recurrence |
|-----------------------------------------------------------------------------------------------------------|-------------------------------|--------------------------------|----------------|-----------------------------------------------|--------------------------------------|
| <b>Study characteristics</b>                                                                              | Studies                       | 26                             | 7              | 19                                            | 10                                   |
|                                                                                                           | Patients: ARID1A+ vs. ARID1A- | 3,735 vs. 1,633                | 373 vs. 454    | 3,139 vs. 1,062                               | 871 vs. 497                          |
| <b>System (0 = urological system [ref.] vs.1 = gastrointestinal system vs. 2 = gynaecological system)</b> | <i>p</i> -value               | 0.07 (gastro)<br>0.43 (gyneco) | 0.11 (gyneco)  | 0.80 (gastro)<br>0.53 (gyneco)                | 0.51 (gastro)<br>0.68 (gyneco)       |
|                                                                                                           | Slope                         | 0.36 (gastro)<br>0.15 (gyneco) | -0.19 (gyneco) | 0.14 (gastro)<br>0.35 (gyneco)                | -0.38 (gastro)<br>0.24 (gyneco)      |
|                                                                                                           | Studies                       | 26                             | 7              | 19                                            | 10                                   |
| <b>Sample size</b>                                                                                        | <i>p</i> -value               | 0.44                           | 0.58           | 0.27                                          | 0.86                                 |
|                                                                                                           | Slope                         | -0.0002                        | 0.0003         | -0.0006                                       | -0.0004                              |
|                                                                                                           | Studies                       | 26                             | 7              | 19                                            | 10                                   |
| <b>Age difference</b>                                                                                     | <i>p</i> -value               | 0.96                           | 0.84           | 0.72                                          | 0.41                                 |
|                                                                                                           | Slope                         | 0.00014                        | 0.0139         | 0.0229                                        | 0.078                                |
|                                                                                                           | Studies                       | 16                             | 6              | 14                                            | 8                                    |
| <b>% Females difference</b>                                                                               | <i>p</i> -value               | 0.38                           | 0.76           | 0.66                                          | 0.52                                 |
|                                                                                                           | Slope                         | 0.0088                         | -0.0041        | 0.0120                                        | -0.03                                |
|                                                                                                           | Studies                       | 25                             | 7              | 17                                            | 9                                    |
| <b>TNM 1–2 difference</b>                                                                                 | <i>p</i> -value               | 0.62                           | 0.11           | 0.96                                          | 0.09                                 |
|                                                                                                           | Slope                         | 0.0024                         | 0.00167        | -0.0008                                       | 0.03                                 |
|                                                                                                           | Studies                       | 20                             | 6              | 15                                            | 8                                    |
| <b>TNM 3–4 difference</b>                                                                                 | <i>p</i> -value               | 0.31                           | 0.36           | 0.75                                          | 0.24                                 |
|                                                                                                           | Slope                         | 0.0039                         | -0.0036        | 0.0046                                        | -0.017                               |
|                                                                                                           | Studies                       | 21                             | 6              | 16                                            | 8                                    |
| <b>Grade 1–2 difference</b>                                                                               | <i>p</i> -value               | <b>0.01</b>                    | 0.80           | 0.20                                          | 0.78                                 |
|                                                                                                           | Slope                         | <b>0.0077</b>                  | 0.0007         | 0.0149                                        | 0.0025                               |
|                                                                                                           | Studies                       | <b>16</b>                      | 5              | 13                                            | 7                                    |
| <b>Grade 3–4 difference</b>                                                                               | <i>p</i> -value               | 0.19                           | 0.39           | 0.30                                          | 0.43                                 |
|                                                                                                           | Slope                         | 0.0082                         | -0.0037        | 0.0157                                        | -0.0179                              |
|                                                                                                           | Studies                       | 15                             | 5              | 12                                            | 7                                    |

(Continued)

| Moderator Variable                                                   |                 | All-cause mortality | Recurrence   | Adjusted HR estimates for all-cause mortality | Adjusted HR estimates for recurrence |
|----------------------------------------------------------------------|-----------------|---------------------|--------------|-----------------------------------------------|--------------------------------------|
| Newcastle-Ottawa scale                                               | <i>p</i> -value | 0.46                | 0.36         | 0.90                                          | 0.33                                 |
|                                                                      | Slope           | -0.06               | -0.14        | -0.02                                         | -0.23                                |
|                                                                      | Studies         | 26                  | 7            | 19                                            | 10                                   |
| Number of adjustments                                                | <i>p</i> -value | 0.83                | <b>0.003</b> | 0.29                                          | 0.86                                 |
|                                                                      | Slope           | -0.0055             | <b>0.11</b>  | 0.056                                         | -0.00115                             |
|                                                                      | Studies         | 26                  | <b>7</b>     | 19                                            | 10                                   |
| Method of ARID1A analysis (0 = TMA-IHC [ref.] vs. 1 = other methods) | <i>p</i> -value | 0.69                | 0.09         | 0.56                                          | 0.66                                 |
|                                                                      | Slope           | 0.20                | -0.23        | -0.24                                         | 0.22                                 |
|                                                                      | Studies         | 26                  | 7            | 19                                            | 10                                   |
| Country (0 = Asia [ref.] vs. 1 = other)                              | <i>p</i> -value | <b>0.04</b>         | 0.82         | 0.35                                          | 0.36                                 |
|                                                                      | Slope           | <b>0.27</b>         | 0.04         | -0.33                                         | -0.41                                |
|                                                                      | Studies         | <b>26</b>           | 7            | 19                                            | 10                                   |
| Mean follow-up period                                                | <i>p</i> -value | 0.84                | 0.79         | 0.30                                          | 0.11                                 |
|                                                                      | Slope           | -0.05               | 0.11         | -0.17                                         | 0.21                                 |
|                                                                      | Studies         | 26                  | 7            | 19                                            | 10                                   |

**Supplementary Table S4: Results Of Multivariable Meta-Regression Analyses Of Moderators Variables**

| Significant Multivariable Moderators | All-cause mortality                                                                                                                                                                              | Recurrence                                                  | Adjusted HR estimates for all-cause mortality                                                        | Adjusted HR estimates for recurrence                                                   |
|--------------------------------------|--------------------------------------------------------------------------------------------------------------------------------------------------------------------------------------------------|-------------------------------------------------------------|------------------------------------------------------------------------------------------------------|----------------------------------------------------------------------------------------|
| <b>Studies N</b>                     | 15<br>4,573                                                                                                                                                                                      | 5<br>946                                                    | No multivariate analysis was made since in the univariate analysis no moderator reached a $p < 0.20$ | 8<br>1,300                                                                             |
| <b>Moderator 1</b>                   | Grade 1–2 difference:<br>Mean difference between groups = 1.17<br>$z = 3.00$<br>$p = 0.0027$                                                                                                     | Covariates:<br>Mean: 2.8<br>$z = 1.68$<br>$p = 0.09$        | -                                                                                                    | TNM 1–2 difference: Mean difference between groups = 10.59<br>$z = 1.65$<br>$p = 0.09$ |
| <b>Moderator 2</b>                   | Gastrointestinal system (38%):<br>$z = 1.47$<br>$p = 0.14$<br>Gynecological System (46%):<br>$z = -0.82$<br>$p = 0.41$<br>Gastrointestinal + gynecological systems vs. urological:<br>$p = 0.02$ | Gynecological System (57%):<br>$z = 0.10$<br>$p = 0.61$     | -                                                                                                    | -                                                                                      |
| <b>Moderator 3</b>                   | -                                                                                                                                                                                                | TNM 1–2 difference:<br>Mean: 11.7<br>$z = -0.01$ $p = 0.99$ | -                                                                                                    | -                                                                                      |
| <b>Overall Model</b>                 | $Q = 35.99$<br>$p < 0.0001$<br>$R^2 = 0.76$                                                                                                                                                      | $Q = 10.44$<br>$p = 0.06$<br>$R^2 = 0.92$                   | -                                                                                                    | $Q = 26.49$<br>$p = 0.0004$<br>$R^2 = 0.41$                                            |



| Moderator                  | Strata        | Analysis details                              | Outcome              |                     |                                               |                                      |
|----------------------------|---------------|-----------------------------------------------|----------------------|---------------------|-----------------------------------------------|--------------------------------------|
|                            |               |                                               | All-cause mortality* | Recurrence*         | Adjusted HR estimates for All-cause mortality | Adjusted HR estimates for recurrence |
| Study quality <sup>b</sup> | NOS score < 7 | <i>Pooled estimate, HR (95%CI)</i>            |                      |                     |                                               |                                      |
|                            |               | <i>p-value for HR</i>                         |                      |                     |                                               |                                      |
|                            |               | <i>Heterogeneity, I<sup>2</sup> (p-value)</i> | 1.06 (0.84–1.34)     |                     | 1.44 (0.99–2.09)                              | <b>3.09 (1.13–8.48)</b>              |
|                            |               | <i>Number of studies</i>                      | 0.61                 |                     | 0.06                                          | <b>0.03</b>                          |
|                            |               | <i>Number of Subjects</i>                     | 89 (<0.0001)         |                     | 0 (0.46)                                      | 0 (1.00)                             |
|                            |               | <i>p-value<sup>a</sup></i>                    | 15                   |                     | 3                                             | 1                                    |
|                            | NOS score ≥ 7 | <i>Pooled estimate, HR (95%CI)</i>            | 2,083                | All studies         | 235                                           | 22                                   |
|                            |               | <i>p-value for HR</i>                         | 0.99 (0.85–1.15)     | had a NOS score ≥ 7 | 1.13 (0.76–1.69)                              | <b>1.84 (1.13–3.00)</b>              |
|                            |               | <i>Heterogeneity, I<sup>2</sup> (p-value)</i> | 0.87                 |                     | 0.54                                          | <b>0.01</b>                          |
|                            |               | <i>Number of studies</i>                      | 81 (<0.0001)         |                     | 71 (<0.0001)                                  | 78 (<0.0001)                         |
|                            |               | <i>Number of Subjects</i>                     | 11                   |                     | 16                                            | 9                                    |
|                            |               | <i>p-value<sup>a</sup></i>                    | 3,205                |                     | 3,956                                         | 1,346                                |
|                            |               | 0.61                                          |                      | 0.40                | 0.37                                          |                                      |

\*For these outcomes, RRs instead of HRs were used.

Bolded RR or HR values:  $p < 0.05$

Abbreviations: NOS, Newcastle-Ottawa Scale

<sup>a</sup>The  $p$ -value for the  $t$ -test between the two statistical analysis strata according to meta-regression procedure.

<sup>b</sup>Stratification was performed by median NOS score and number of adjustments as appropriate.
